# Supplementary material for: An approach towards the synthesis and characterization of ZnO@Ag core@shell nanoparticles in water-in-oil microemulsion
Source: Royal Society of Chemistry journal article supplement (doi:10.1039/c4ra01046a), 2014-01-01
Supplement: c4ra01046a1.pdf [file c4ra01046a1.pdf]

## Supplementary Information

Cite this: DOI: 10.1039/c0xx00000x

www.rsc.org/xxxxxx

ARTICLE TYPE

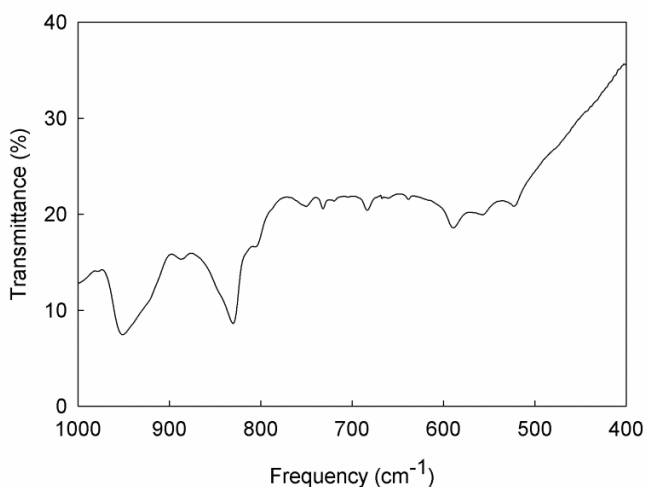

5 Fig.S1: FTIR spectrum of ZnO nanoparticles synthesized at  $W_0=13.34$ .

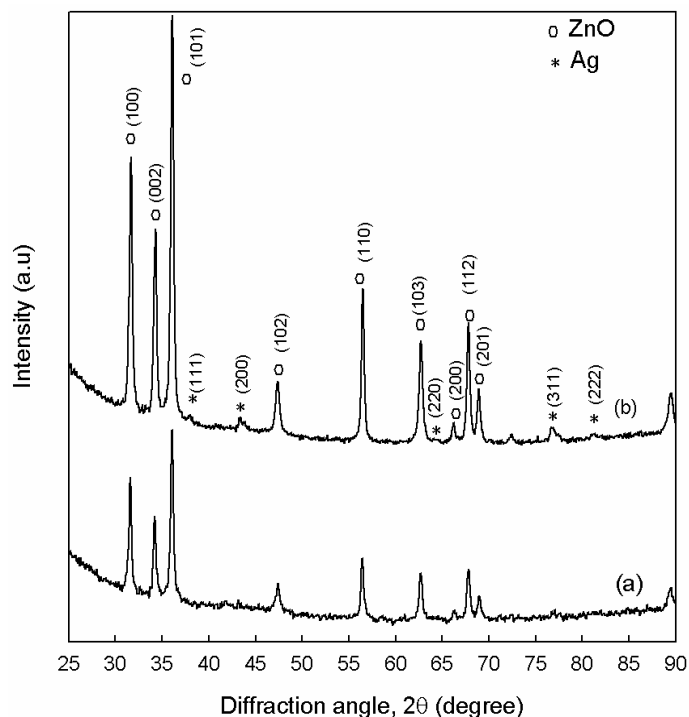

Fig.S2: XRD diffractograms of (a) ZnO nanoparticles and (b) ZnO@Ag core@shell nanoparticles synthesized at  $W_0=13.34$ .

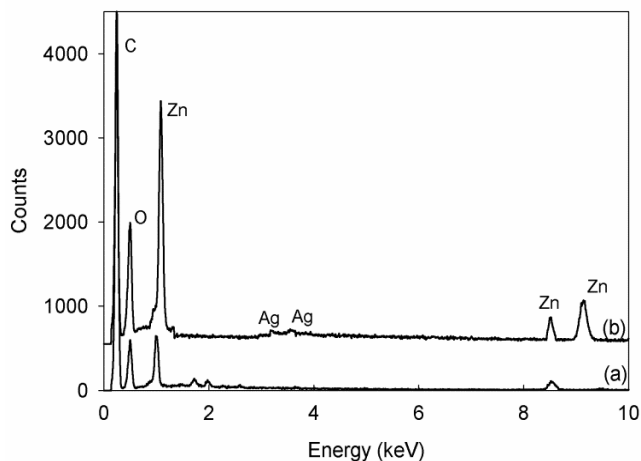

10 Fig.S3: EDX spectra of (a) ZnO nanoparticles and (b) ZnO@Ag core@shell nanoparticles synthesized at  $W_0=13.34$ .

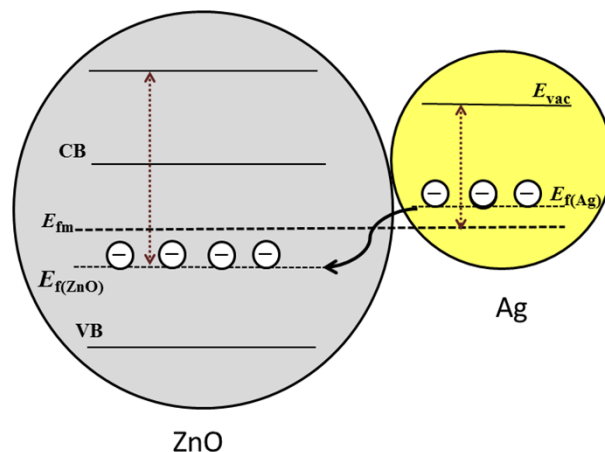

Fig.S4: Energy band structure of Ag and ZnO showing formation of new Fermi level by back-donation of electrons.

15

20

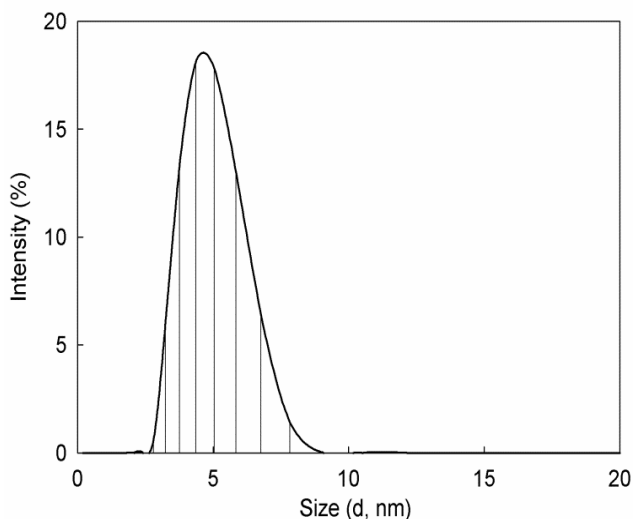

5 **Fig.S5:** Size distribution of the reverse micelle in w/o microemulsion of TX-100/hexanol/cyclohexane at  $W_0=13.34$ .

#### XRD instrumentation

Philips PW 1724 X-ray generator using XDC-700 Guinier-Hagg focusing camera with strictly monochromatized Cu  $K\alpha$ , radion 20 ( $\lambda = 1.540598 \text{ \AA}$ ).

Exposure time was 15 minutes at 40 kV-30 mA on an image plate. After exposure, the image plate was scanned using HD-CR 35 NDT/CR 35 NDT scanner.

#### 25 Scanning Electron Microscope instrumentation

JEOL analytical scanning electron microscope, model JSM-6490LA

#### Energy Dispersive X-Ray (EDX) instrumentation

30 JEOL analytical scanning electron microscope, model JSM-6490LA

#### Field Emission Scanning Electron Microscope instrumentation

35 FESEM JEOL 7600F

#### Particle Size Analyzer

Nano ZS90, ZEN 3690

#### 40 Fourier Transform Infrared (FTIR) Spectrometer

Perkin Elmer FTIR-NIR spectrometer

#### UV-visible Spectrometer

UVD-500 (Labomed, USA)

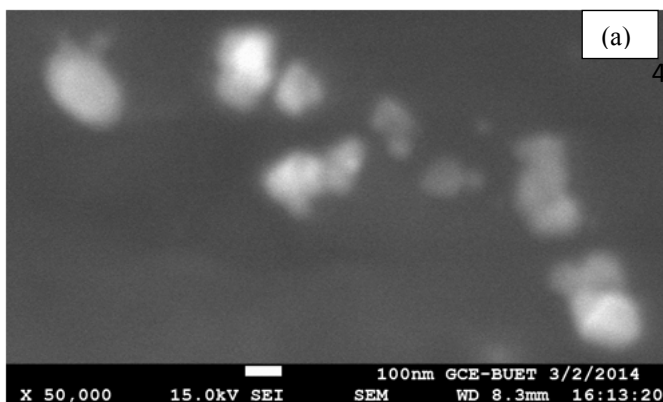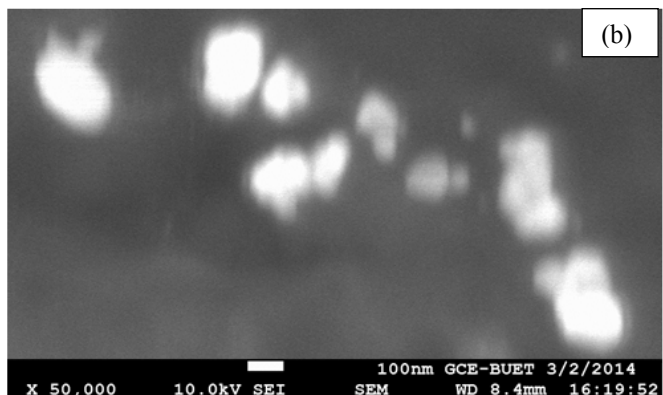

10 **Fig.S6:** FESEM image of ZnO@Ag core@shell nanoparticles synthesized at  $W_0=13.34$  taken at (a) high (15 kV) and (b) low (10 kV) accelerating voltage revealing the size of the core and the shell.

15
